# Supplementary material for: Children, parents and pets exercising together (CPET): exploratory randomised controlled trial
Source: PubMed Central journal article supplement (PMC4222564; doi:10.1186/1471-2458-13-1096), 2013-11-27
Supplement: 1471-2458-13-1096-S1.pdf [file 1471-2458-13-1096-S1.pdf]

# Children, parents and pets exercising together (CPET): exploratory randomised controlled trial.

## Supplementary information

Table 3. Body composition related outcome measures for intervention and control groups

|                                       | Baseline               |                   | Follow-up              |                   | Difference in change between intervention and control (95% CI) | P value | Effect size (Cohen's d) |
|---------------------------------------|------------------------|-------------------|------------------------|-------------------|----------------------------------------------------------------|---------|-------------------------|
|                                       | Intervention Mean (SD) | Control Mean (SD) | Intervention Mean (SD) | Control Mean (SD) |                                                                |         |                         |
| <b>Children</b>                       | <b>N = 17</b>          | <b>N = 13</b>     | <b>N = 17</b>          | <b>N = 13</b>     |                                                                |         |                         |
| Body weight (kg)                      | 37.3 (6.1)             | 39.8 (11.9)       | 38.3 (6.7)             | 40.6 (11.8)       | 0.2 (-0.3, 0.8)                                                | 0.69    | 0.14                    |
| BMI (kg/m <sup>2</sup> )              | 18.4 (2.2)             | 18.7 (4.7)        | 18.5 (2.3)             | 18.7 (4.6)        | 0.1 (-0.1, 0.3)                                                | 0.71    | 0.15                    |
| BMI z-score                           | 0.32 (0.90)            | 0.11 (1.65)       | 0.28 (0.90)            | 0.06 (1.51)       | 0.01 (-0.08, 0.10)                                             | 0.77    | 0.04                    |
|                                       | <b>N = 14</b>          | <b>N = 11</b>     | <b>N = 14</b>          | <b>N = 11</b>     |                                                                |         |                         |
| Fat Mass Index (kg/m <sup>2</sup> )   | 5.0 (1.9)              | 5.5 (3.8)         | 5.1 (2.0)              | 5.4 (3.8)         | 0.2 (0.0, 0.4)                                                 | 0.33    | 0.39                    |
| Lean Mass Index (kg/m <sup>2</sup> )  | 12.2 (0.9)             | 12.4 (1.3)        | 13.3 (4.2)             | 12.5 (1.3)        | 1.1 (0.2, 1.9)                                                 | 0.38    | 0.51                    |
| Whole body BMC (g/cm <sup>2</sup> )   | 0.90 (0.04)            | 0.93 (0.08)       | 0.89 (0.07)            | 0.94 (0.08)       | -0.02 (-0.04, -0.01)                                           | 0.41    | 0.50                    |
| Lumbar spine BMC (g/cm <sup>2</sup> ) | 0.74 (0.08)            | 0.76 (0.09)       | 0.73 (0.05)            | 0.77 (0.09)       | -0.02 (-0.03, 0.01)                                            | 0.28    | 0.50                    |
| <b>Parents</b>                        | <b>N = 16</b>          | <b>N = 12</b>     | <b>N = 16</b>          | <b>N = 12</b>     |                                                                |         |                         |
| Body weight (kg)                      | 75.0 (15.8)            | 64.6 (9.5)        | 74.8 (15.4)            | 64.4 (9.6)        | 0.0 (-0.7, 0.7)                                                | 0.71    | 0.00                    |
| BMI (kg/m <sup>2</sup> )              | 26.5 (3.9)             | 23.8 (2.9)        | 26.5 (3.9)             | 23.7 (3.0)        | 0.1 (-0.1, 0.3)                                                | 0.85    | 0.17                    |
| <b>Dogs</b>                           | <b>N = 16</b>          | <b>N = 12</b>     | <b>N = 16</b>          | <b>N = 12</b>     |                                                                |         |                         |
| Body weight (kg)                      | 18.2 (10.1)            | 15.0 (7.9)        | 17.9 (10.0)            | 14.8 (8.3)        | -0.1 (-0.2, 0.5)                                               | 0.63    | 0.17                    |
| Body condition score                  | 2.9 (0.4)              | 3.1 (0.5)         | 3.0 (0.0)              | 3.1 (0.3)         | 0.1 (-0.1, 0.3)                                                | 0.38    | 0.25                    |

Table 4. Child Health Related Quality of Life for intervention and control groups

|                     | Baseline                         |                             | Follow-up                        |                             | Difference in change between intervention and control (95% CI) | p value | Effect size (Cohen's d) |
|---------------------|----------------------------------|-----------------------------|----------------------------------|-----------------------------|----------------------------------------------------------------|---------|-------------------------|
|                     | Intervention Mean (SD)<br>N = 17 | Control Mean (SD)<br>N = 13 | Intervention Mean (SD)<br>N = 17 | Control Mean (SD)<br>N = 13 |                                                                |         |                         |
| <b>Self report</b>  |                                  |                             |                                  |                             |                                                                |         |                         |
| Physical health     | 82.1 (20.7)                      | 88.7 (12.8)                 | 86.2 (9.4)                       | 87.7 (13.4)                 | 5.1 (0.1, 10.1)                                                | 0.80    | 0.38                    |
| Psychosocial health | 84.2 (11.3)                      | 82.6 (15.3)                 | 80.5 (13.8)                      | 80.3 (18.6)                 | -1.4 (-5.7, 2.9)                                               | 0.78    | 0.12                    |
| Total score         | 83.5 (10.7)                      | 84.7 (13.7)                 | 82.5 (11.0)                      | 82.9 (15.5)                 | 0.9 (-2.9, 4.6)                                                | 0.88    | 0.01                    |
| <b>Proxy report</b> |                                  |                             |                                  |                             |                                                                |         |                         |
| Physical health     | 84.2 (12.4)                      | 90.6 (12.6)                 | 84.7 (20.2)                      | 87.5 (17.7)                 | 3.6 (-4.7, 12.0)                                               | 0.74    | 0.16                    |
| Psychosocial health | 79.2 (10.3)                      | 80.9 (11.4)                 | 83.2 (12.2)                      | 81.8 (13.3)                 | 3.1 (-1.5, 7.7)                                                | 0.58    | 0.25                    |
| Total score         | 81.0 (9.4)                       | 84.3 (10.6)                 | 83.7 (12.9)                      | 83.8 (14.0)                 | 3.3 (-2.3, 8.8)                                                | 0.84    | 0.22                    |
